# Supplementary material for: Effects of Landscape Attributes on Campuses Bird Species Richness and Diversity, Implications for Eco-Friendly Urban Planning
Source: MDPI journal article supplement (doi:10.3390/su13105558), 2021-05-17
Supplement: s1 [file s1]

**Table S1: The checklist of bird species recorded from the surveyed 12 Universities, Nanjing**

| Order            | Family        | Bird                      | Scientific name                | Migration pattern | Feeding guild | China endangered status |
|------------------|---------------|---------------------------|--------------------------------|-------------------|---------------|-------------------------|
| Podicipediformes | Podicipedidae | Little Grebe              | <i>Tachybaptus ruficollis</i>  | R                 | C             | BIESV                   |
| Ciconiiformes    | Ardeidae      | Little Egret              | <i>Egretta garzetta</i>        | SV                | C             | BIESV                   |
|                  |               | Chinese Pond-heron        | <i>Ardeola bacchus</i>         | SV                | C             | BIESV                   |
|                  |               | Black-crowned Night-heron | <i>Nycticorax nycticorax</i>   | R                 | C             | BIESV                   |
|                  |               | Cattle Egret              | <i>Bubulcus ibis</i>           | SV                | C             | BIESV                   |
|                  |               | Striated Heron            | <i>Butorides striata</i>       | SV                | C             | BIESV                   |
| Gruiformes       | Rallidae      | Common Moorhen            | <i>Gallinula chloropus</i>     | R                 | O             | BIESV                   |
| Columbiformes    | Columbidae    | Oriental Turtle-dove      |                                | R                 | F             | BIESV                   |
|                  |               |                           | <i>Streptopelia orientalis</i> |                   |               |                         |
|                  |               | Spotted Dove              | <i>Spilopelia chinensis</i>    | R                 | F             | BIESV                   |
| Passeriformes    | Pycnonotidae  | Rock Pigeon               | <i>Columba livia</i>           | R                 | F             | BIESV                   |
|                  |               | Chinese Bulbul            | <i>Pycnonotus sinensis</i>     | R                 | O             | BIESV                   |
|                  |               | Collared Finchbill        | <i>Spizixos semitorques</i>    | R                 | O             | BIESV                   |
|                  | Motacillidae  | Red-whiskered Bulbul      | <i>Pycnonotus jocosus</i>      | WV                | O             | BIESV                   |
|                  |               | White Wagtail             | <i>Motacilla alba</i>          | R                 | I             | BIESV                   |
|                  |               | Grey Wagtail              | <i>Motacilla cinerea</i>       | PM                | I             | BIESV                   |
|                  |               | Olive-backed Pipit        | <i>Anthus hodgsoni</i>         | WV                | O             | BIESV                   |
|                  | Laniidae      | Long-tailed Shrike        | <i>Lanius schach</i>           | R                 | I             | BIESV                   |
|                  |               | Brown Shrike              | <i>Lanius cristatus</i>        | SV                | I             | BIESV                   |
|                  | Corvidae      | Azure-winged Magpie       | <i>Cyanopica cyanus</i>        | R                 | O             | BIESV                   |
|                  |               | Black-billed Magpie       | <i>Pica pica</i>               | R                 | O             | BIESV                   |

|       |                   | Blue Magpie                | <i>Urocissa erythrorhyncha</i>   | R                 | O             | BIESV                   |
|-------|-------------------|----------------------------|----------------------------------|-------------------|---------------|-------------------------|
|       |                   | Grey Treepie               | <i>Dendrocitta formosae</i>      | R                 | O             | BIESV                   |
|       | Turdidae          | Common Blackbird           | <i>Turdus merula</i>             | R                 | O             | BIESV                   |
| Order | Family            | Bird                       | Scientific name                  | Migration pattern | Feeding guild | China endangered status |
|       |                   | Grey-backed Thrush         | <i>Turdus hortulorum</i>         | WV                | O             | BIESV                   |
|       | Timaliidae        | Masked Laughingthrush      | <i>Garrulax perspicillatus</i>   | R                 | O             | BIESV                   |
|       | Ploceidae         | Tree Sparrow               | <i>Passer montanus</i>           | R                 | O             | BIESV                   |
|       |                   | White-rumped Munia         | <i>Lonchura striata</i>          | R                 | F             | BIESV                   |
|       | Passeridae        | Yellow-billed Grosbeak     | <i>Eophona migratoria</i>        | R                 | O             | BIESV                   |
|       |                   | Oriental Greenfinch        | <i>Carduelis sinica</i>          | R                 | O             | BIESV                   |
|       |                   | Brambling                  | <i>Fringilla montifringilla</i>  | WV                | F             | BIESV                   |
|       | Dicruridae        | Black Drongo               | <i>Dicrurus macrocercus</i>      | R                 | O             | BIESV                   |
|       | Paradoxornithidae | Vinous-throated Parrotbill | <i>Paradoxornis webbianus</i>    | R                 | O             | BIESV                   |
|       | Paridae           | Great Tit                  | <i>Parus minor</i>               | R                 | I             | BIESV                   |
|       |                   | Long-tailed Tit            | <i>Aegithalos caudatus</i>       | R                 | I             | BIESV                   |
|       |                   | Black-throated Tit         | <i>Aegithalos concinnus</i>      | R                 | I             | BIESV                   |
|       |                   | Yellow-bellied Tit         | <i>Parus venustulus</i>          | WV                | I             | BIESV                   |
|       | Sturnidae         | Crested Myna               | <i>Acridotheres cristatellus</i> | R                 | O             | BIESV                   |
|       |                   | Red-billed Starling        | <i>Sturnus sericeus</i>          | R                 | O             | BIESV                   |
|       |                   | White-cheeked Starling     | <i>Sturnus cineraceus</i>        | R                 | O             | BIESV                   |
|       |                   | Black-collared Starling    | <i>Sturnus nigricollis</i>       | WV                | O             | BIESV                   |
|       | Muscicapidae      | Oriental Magpie-robin      | <i>Copsychus saularis</i>        | R                 | I             | BIESV                   |
|       |                   | Daurian Redstart           | <i>Phoenicurus auroreus</i>      | WV                | I             | BIESV                   |
|       |                   | Red-flanked Bush Robin     | <i>Tarsiger cyanurus</i>         | WV                | I             | BIESV                   |

|                 | Sylviidae     | Yellow-rumped Willow Warbler  | <i>Phylloscopus proregulus</i>  | WV                | I             | BIESV                   |
|-----------------|---------------|-------------------------------|---------------------------------|-------------------|---------------|-------------------------|
|                 |               | Yellow-browed Willow Warbler  | <i>Phylloscopus inornatus</i>   | WV                | I             | BIESV                   |
|                 |               | Brownish-flanked Bush-warbler | <i>Horornis fortipes</i>        | R                 | I             | BIESV                   |
|                 | Hirundinidae  | Red-rumped Swallow            | <i>Hirundo daurica</i>          | SV                | I             | BIESV                   |
| Order           | Family        | Bird                          | Scientific name                 | Migration pattern | Feeding guild | China endangered status |
|                 |               | Barn Swallow                  | <i>Hirundo rustica</i>          | SV                | I             | BIESV                   |
|                 | Campephagidae | Brown-rumped Minivet          | <i>Pericrocotus cantonensis</i> | PM                | I             | BIESV                   |
|                 | Zosteropidae  | Japanese White-eye            | <i>Zosterops japonicus</i>      | SV                | I             | BIESV                   |
| Piciformes      | Picidae       | Grey-capped Pygmy Woodpecker  | <i>Dendrocopos canicapillus</i> | R                 | I             | BIESV                   |
|                 |               | Speckled Piculet              | <i>Picumnus innominatus</i>     | R                 | I             | BIESV                   |
|                 |               | Great Spotted Woodpecker      | <i>Dendrocopos major</i>        | R                 | I             | BIESV                   |
|                 |               | Grey-faced Woodpecker         | <i>Picus canus</i>              | R                 | I             | BIESV                   |
| Falconiformes   | Accipitridae  | Black Kite                    | <i>Milvus migrans</i>           | R                 | C             | II                      |
| Coraciiformes   | Alcedinidae   | Common Kingfisher             | <i>Alcedo atthis</i>            | R                 | C             | BIESV                   |
|                 |               | Pied Kingfisher               | <i>Ceryle rudis</i>             | R                 | C             | BIESV                   |
|                 | Coraciidae    | Broad-billed Roller           | <i>Eurystomus orientalis</i>    | PM                | I             | BIESV                   |
| Charadriiformes | Charadriidae  | Grey-headed Lapwing           |                                 |                   | I             | BIESV                   |
|                 |               |                               | <i>Vanellus cinereus</i>        | WV                |               |                         |
|                 | Scolopacidae  | Green Sandpiper               | <i>Tringa ochropus</i>          | WV                | C             | BIESV                   |
| Cuculiformes    | Cuculidae     | Asian Koel                    | <i>Eudynamys scolopaceus</i>    | R                 | O             | BIESV                   |
|                 |               | Large Hawk-Cuckoo             | <i>Cuculus sparveriioides</i>   | SV                | I             | BIESV                   |
|                 |               | Indian Cuckoo                 | <i>Cuculus micropterus</i>      | SV                | I             | BIESV                   |
| Anseriformes    | Anatidae      | Eastern Spot-billed Duck      | <i>Anas poecilorhyncha</i>      | WV                | O             | BIESV                   |

|                |             |                          |                               |   |   |       |
|----------------|-------------|--------------------------|-------------------------------|---|---|-------|
| Galliformes    | Phasianidae | Chinese Bamboo Partridge | <i>Bambusicola thoracicus</i> | R | O | BIESV |
|                |             | Ring-necked Pheasant     | <i>Phasianus colchicus</i>    | R | O | BIESV |
| Bucerotiformes | Upupidae    | Eurasian Hoopoe          | <i>Upupa epops</i>            | R | I | BIESV |

Abbreviations: R=Resident bird, SV=Summer visitor, WV=Winter visitor, PM=passage migrant, C = Carnivorous, F = Frugivorous, I = Insectivorous, O = Omnivorous , BIESV=Beneficial or of important economic or scientific value, II=China's national secondary protection animal.
